# Supplementary figures and images for: Ciliary chemosensitivity is enhanced by cilium geometry and motility
Source: eLife journal article supplement (doi:10.7554/elife.66322), 2021-08-04

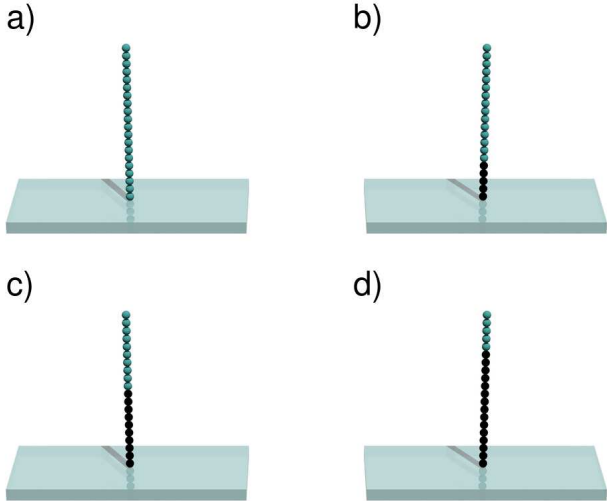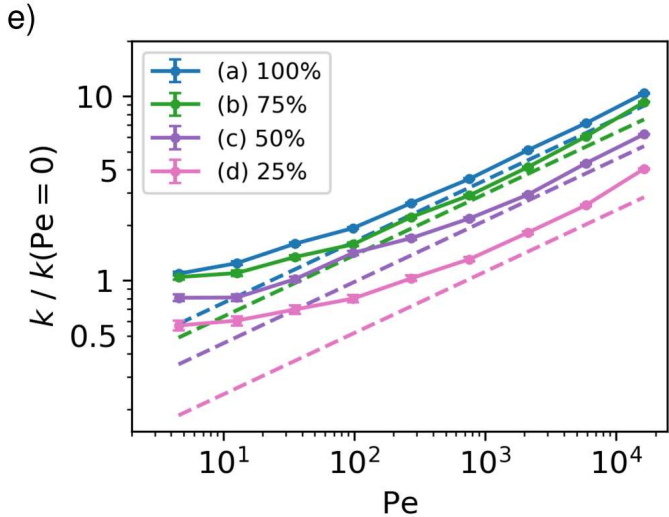

Supplement: supp [file elife-66322-supp-v1.zip]

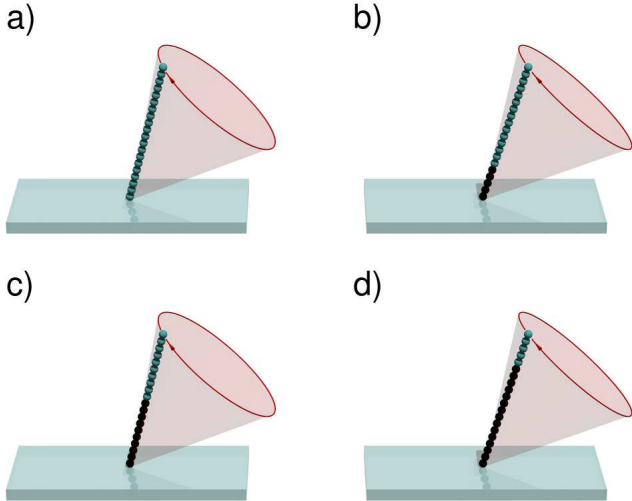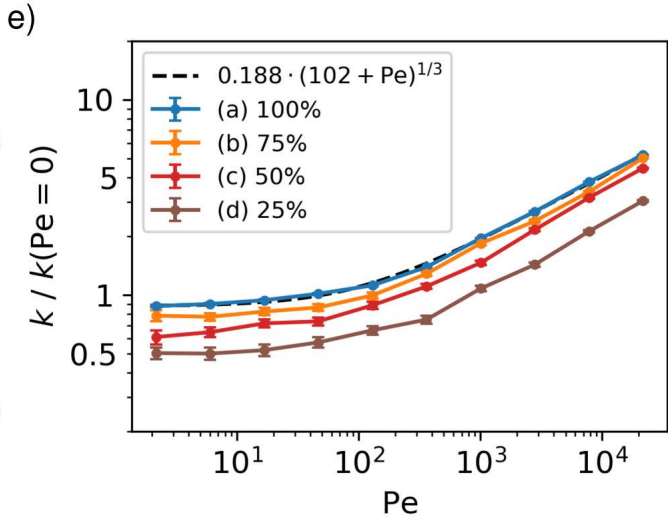

Supplement: supp [file elife-66322-supp-v1.zip]
